# Supplementary material for: Unique NiCo bimetal boosting 98% CH4 selectivity and high catalysis stability for photothermal CO2 hydrogenation
Source: Royal Society of Chemistry journal article supplement (doi:10.1039/d4nr05471g), 2025-01-01
Supplement: d4nr05471g1.pdf [file d4nr05471g1.pdf]

## Unique NiCo Bimetal-Boosting 98% CH<sub>4</sub> Selectivity and High Catalysis Stability for Photothermal CO<sub>2</sub> Hydrogenation

Yubin Zheng<sup>a‡</sup>, Zhe Lu<sup>b‡</sup>, Zhisheng Shi<sup>c\*</sup>, Lu, Wang<sup>b</sup>, Shuyuan Yang<sup>d</sup>, Runzhi Cao<sup>a</sup>,  
Gao Wa<sup>e\*</sup>, Xin Zhou<sup>df\*</sup>, Yong Yang<sup>g</sup>, Chong Sheng<sup>a</sup>, Yong Zhou<sup>a,b,\*</sup> and Zhigang  
Zou<sup>a,b</sup>

<sup>a</sup> Key Laboratory of Modern Acoustics (MOE), Institute of Acoustics, School of Physics, Jiangsu Key Laboratory of Nanotechnology, Eco-materials and Renewable Energy Research Center (ERERC), National Laboratory of Solid-State Microstructures, Collaborative Innovation Center of Advanced Microstructures, Nanjing University, Nanjing, Jiangsu 210093, P. R. China. E-mail: zhouyong1999@nju.edu.cn.

<sup>b</sup> School of Science and Engineering, The Chinese University of Hong Kong, Shenzhen, Shenzhen 518172, P. R. China.

<sup>c</sup> School of Chemical and Environmental Engineering, Anhui Polytechnic University Wuhu, Anhui, 241000, P. R. China. E-mail: shizhisheng@ahpu.edu.cn.

<sup>d</sup> College of Environment and Chemical Engineering, Dalian University, Dalian 116622, P. R. China.

<sup>e</sup> School of Physical Science and Technology, Tiangong University, Tianjin 300387, P.R. China. E-mail: gaowa@tiangong.edu.cn.

<sup>f</sup> Interdisciplinary Research Center for Biology and Chemistry, Liaoning Normal University, Dalian 116029, P. R. China. Email: [xzhou@lnnu.edu.cn](mailto:xzhou@lnnu.edu.cn).

<sup>g</sup> School of Chemistry and Chemical Engineering, Nanjing University of Science and Technology, Nanjing 210094, China. [ychem@njust.edu.cn](mailto:ychem@njust.edu.cn).

<sup>‡</sup>These authors contributed equally to this work and should be considered co-first authors.

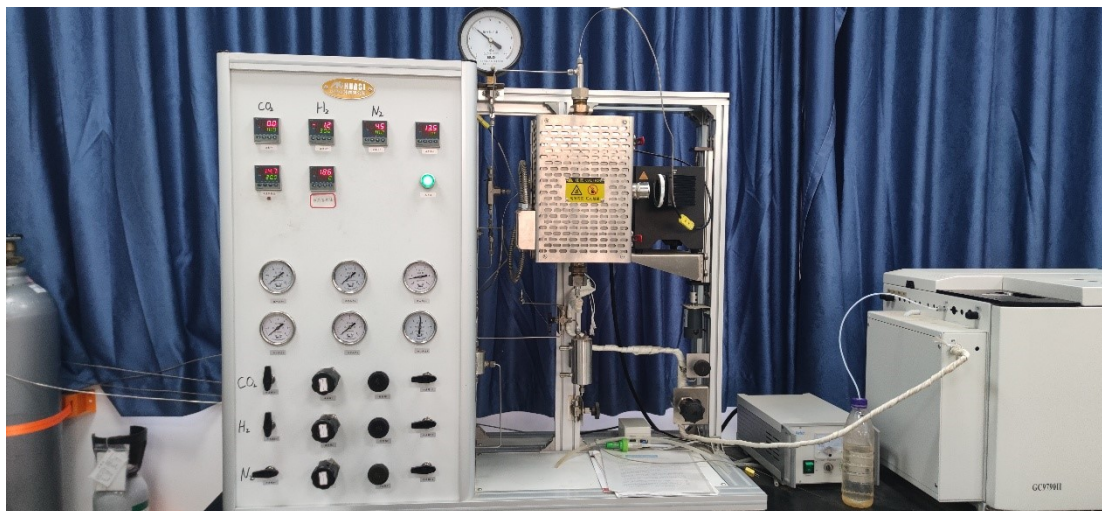

**Figure S1.** Photographic picture of photothermal catalytic reaction devices.

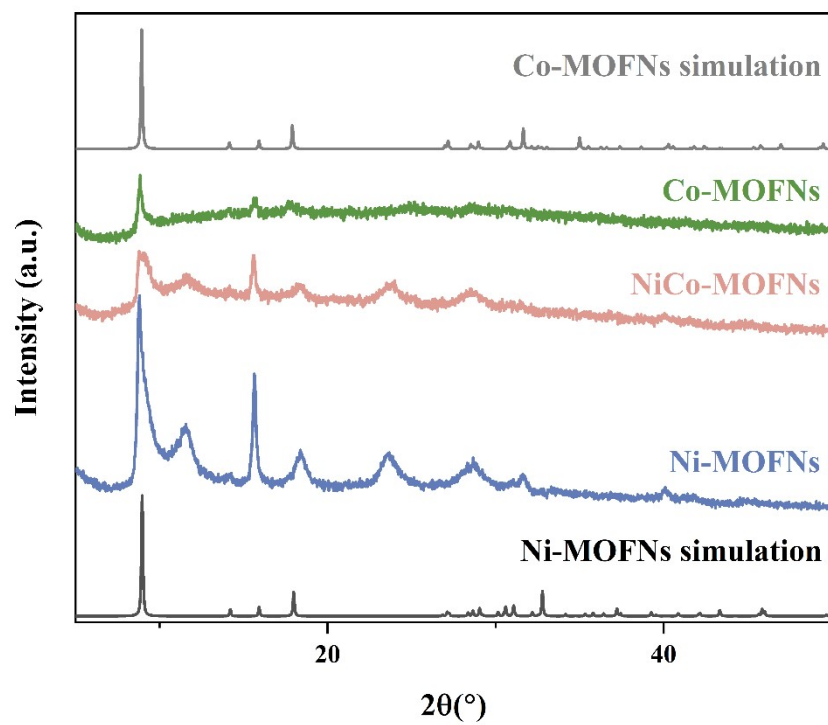

**Figure S2.** PXRD patterns of Ni-MOFNs, Co-MOFNs, and NiCo-MOFNs, as compared to the corresponding powder pattern.<sup>1</sup>

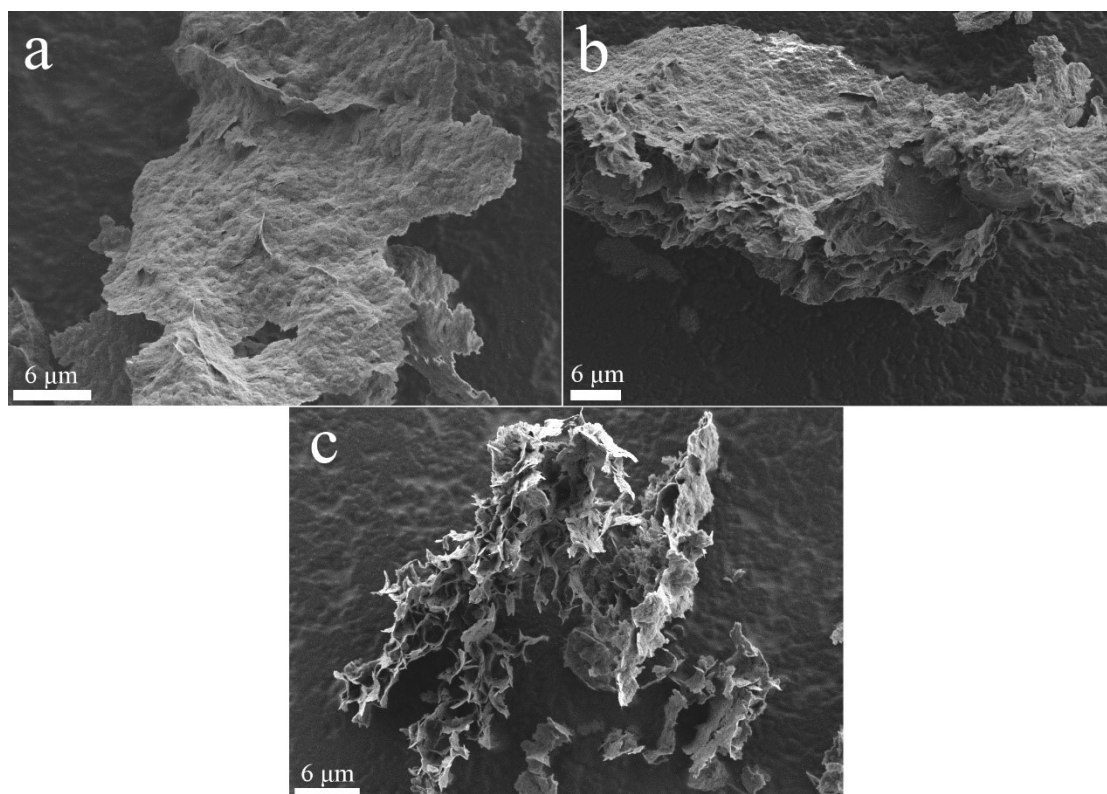

**Figure S3.** SEM images of a) Ni-MOFNs, b) Co-MOFNs, and c) NiCo-MOFNs.

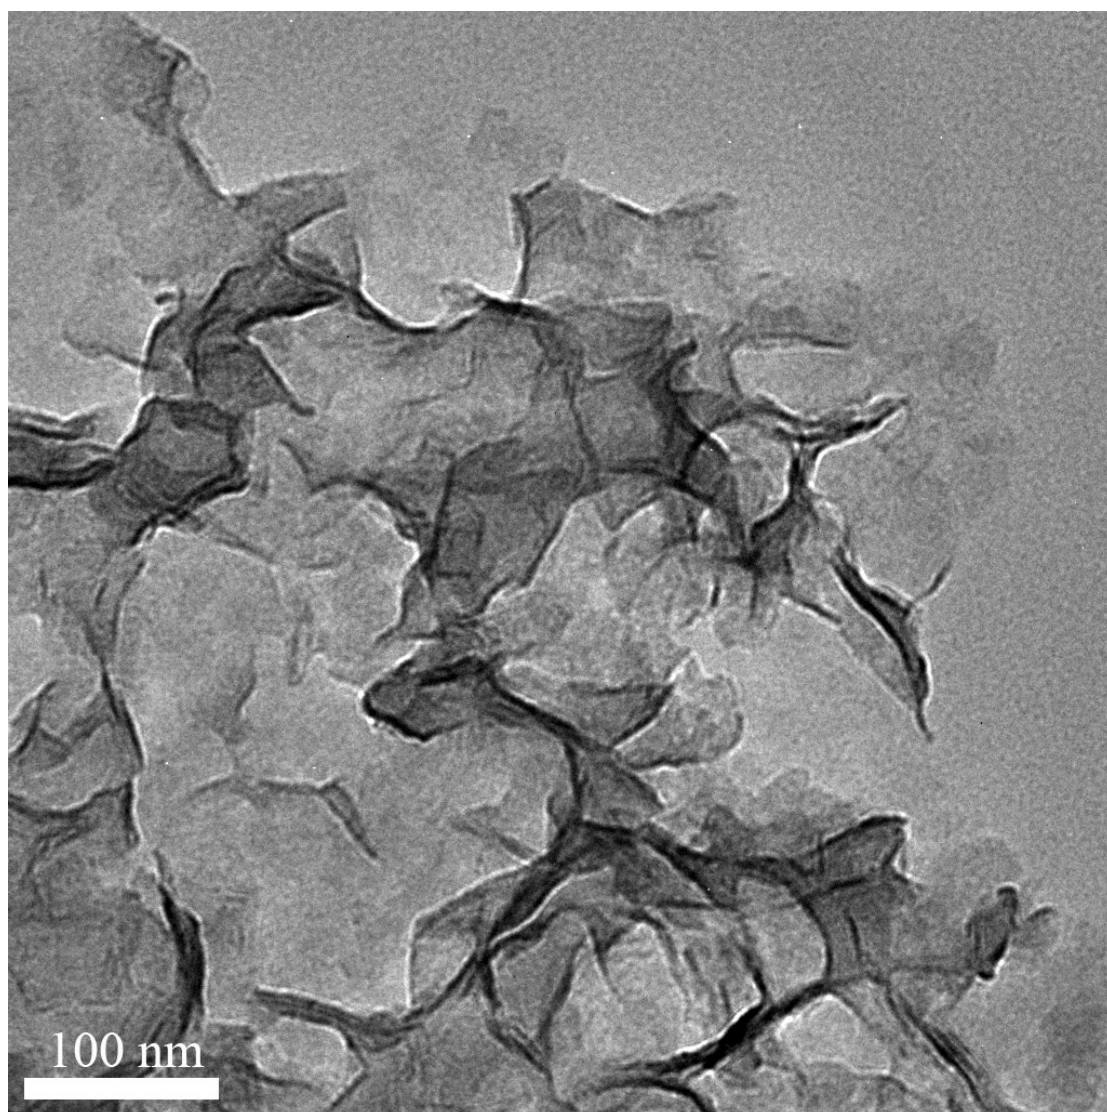

**Figure S4.** TEM image of NiCo-MOFNs.

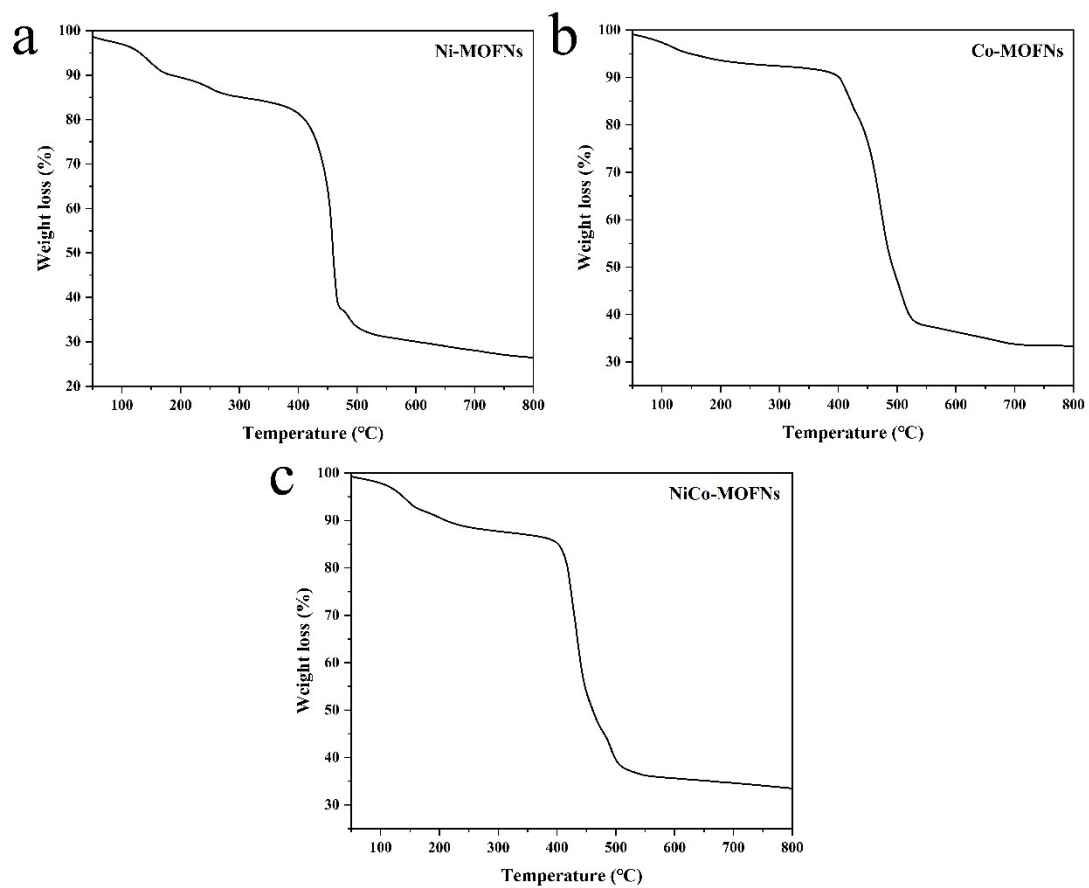

**Figure S5.** TGA curve of a) Ni-MOFNs, b) Co-MOFNs, and c) NiCo-MOFNs in N<sub>2</sub> atmosphere with a heating rate of 5 °C min<sup>-1</sup>.

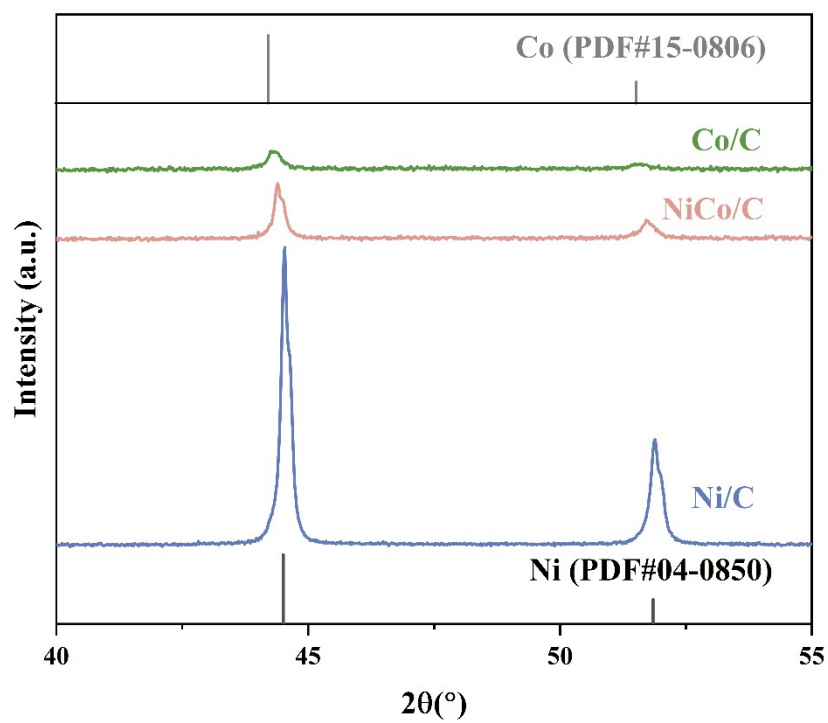

**Figure S6.** PXRD patterns of Ni/C、Co/C、NiCo/C, as compared to the corresponding powder pattern (Ni, PDF#04-0850, and Co, PDF#15-0806).

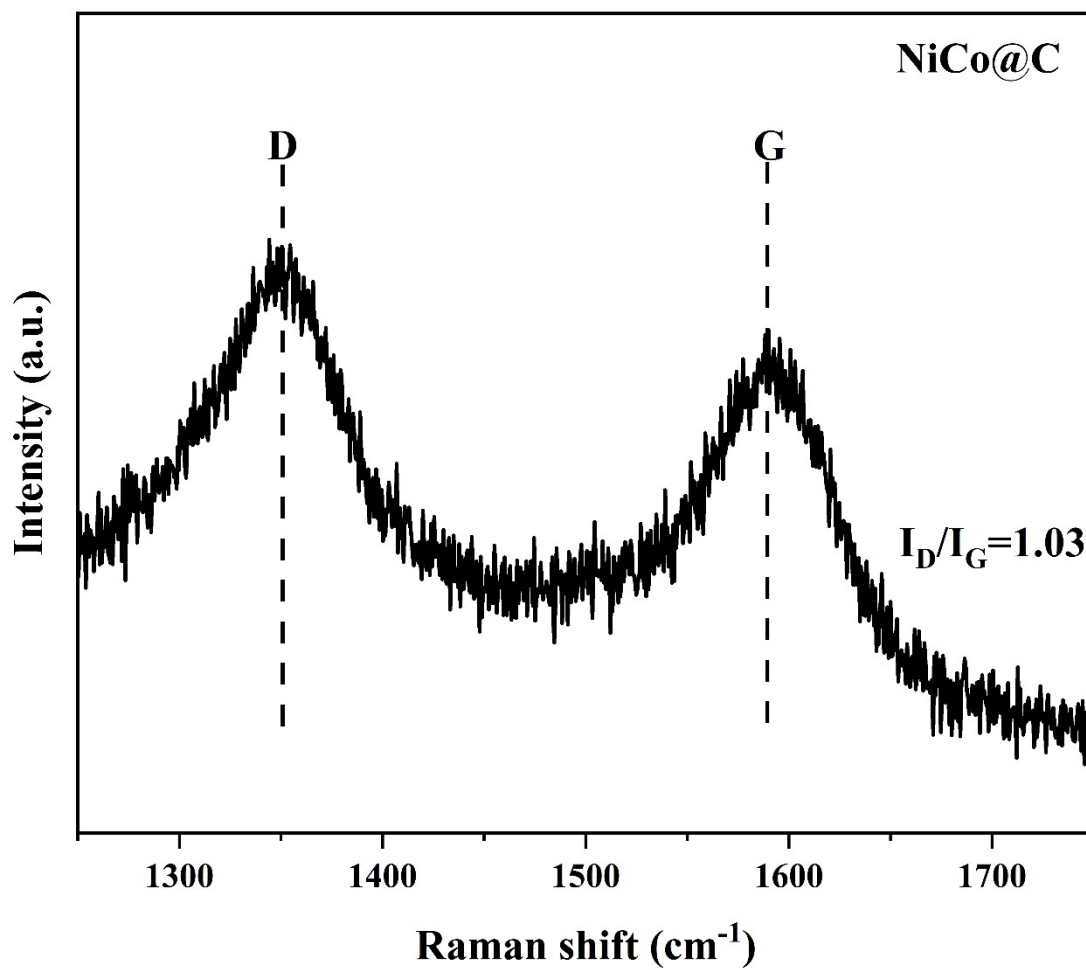

Figure S7. Raman spectroscopy of the NiCo/C.

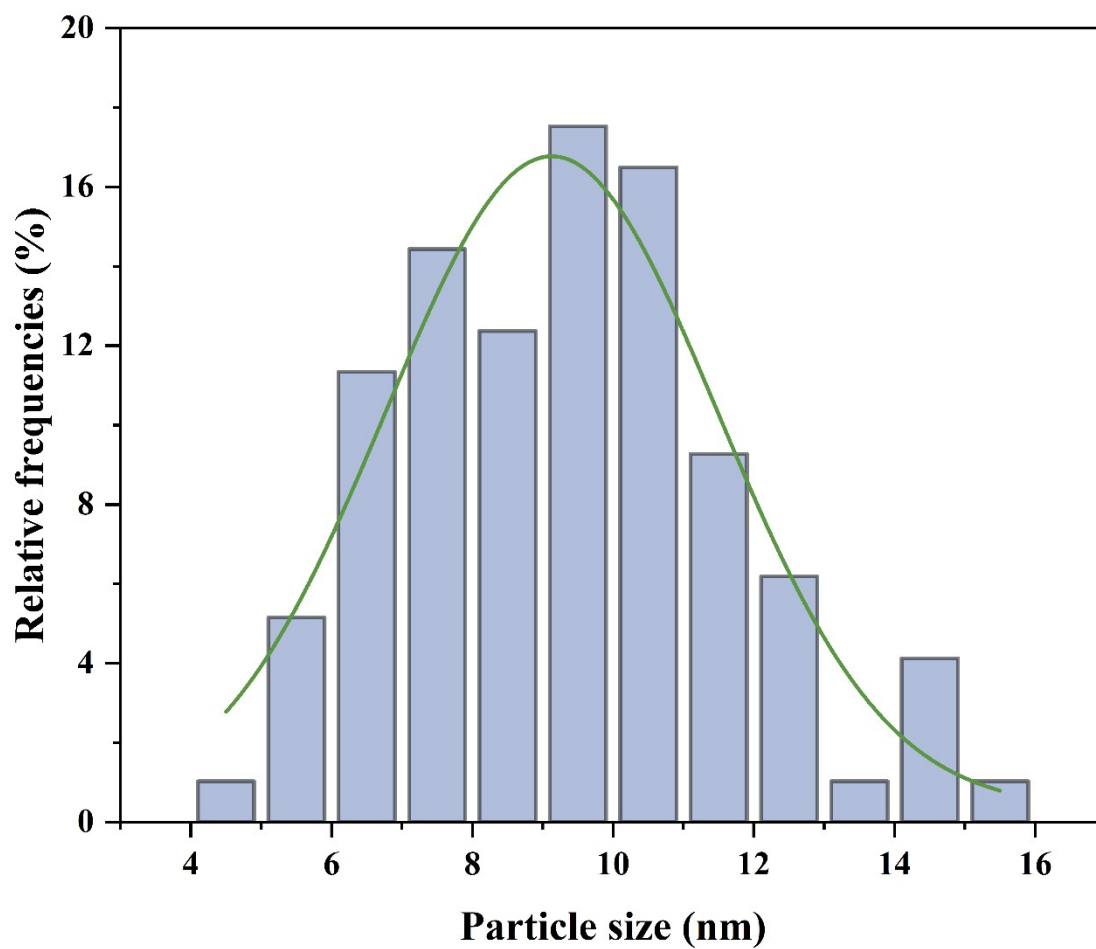

**Figure S8.** Particle size distribution of NiCo alloy nanoparticles in the NiCo/C.



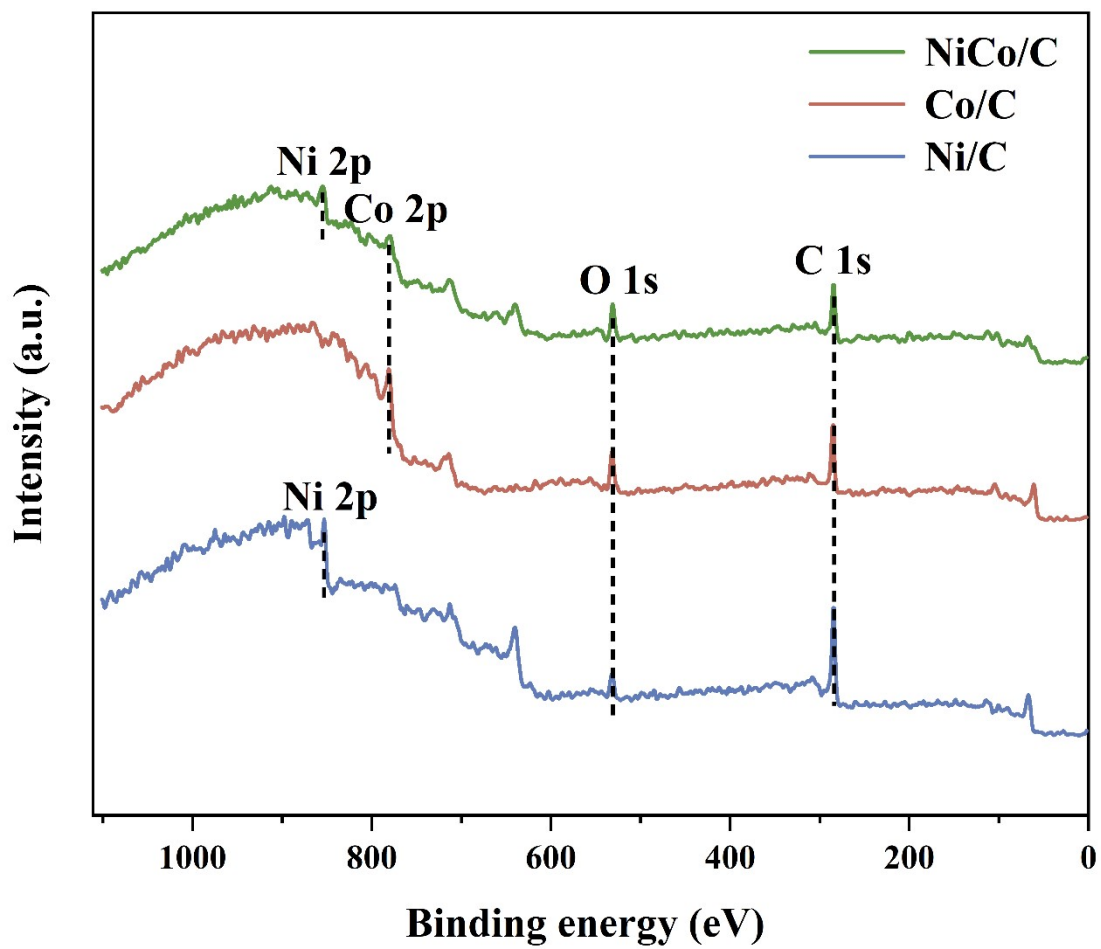

**Figure S9.** Full XPS spectra of Ni/C, Co/C and NiCo/C.

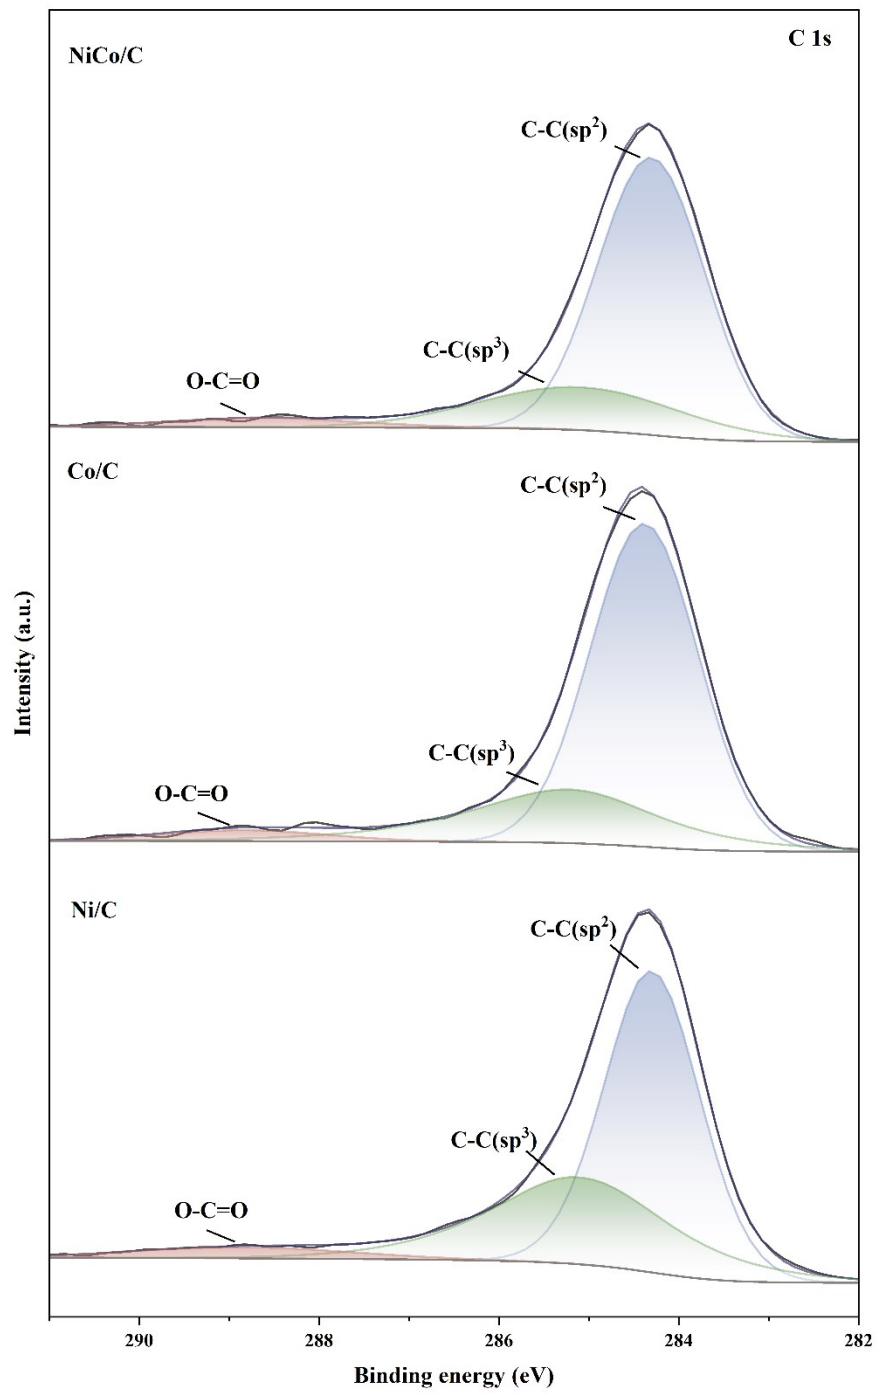

**Figure S10.** XPS spectra of C 1s for Ni/C, Co/C and NiCo/C.

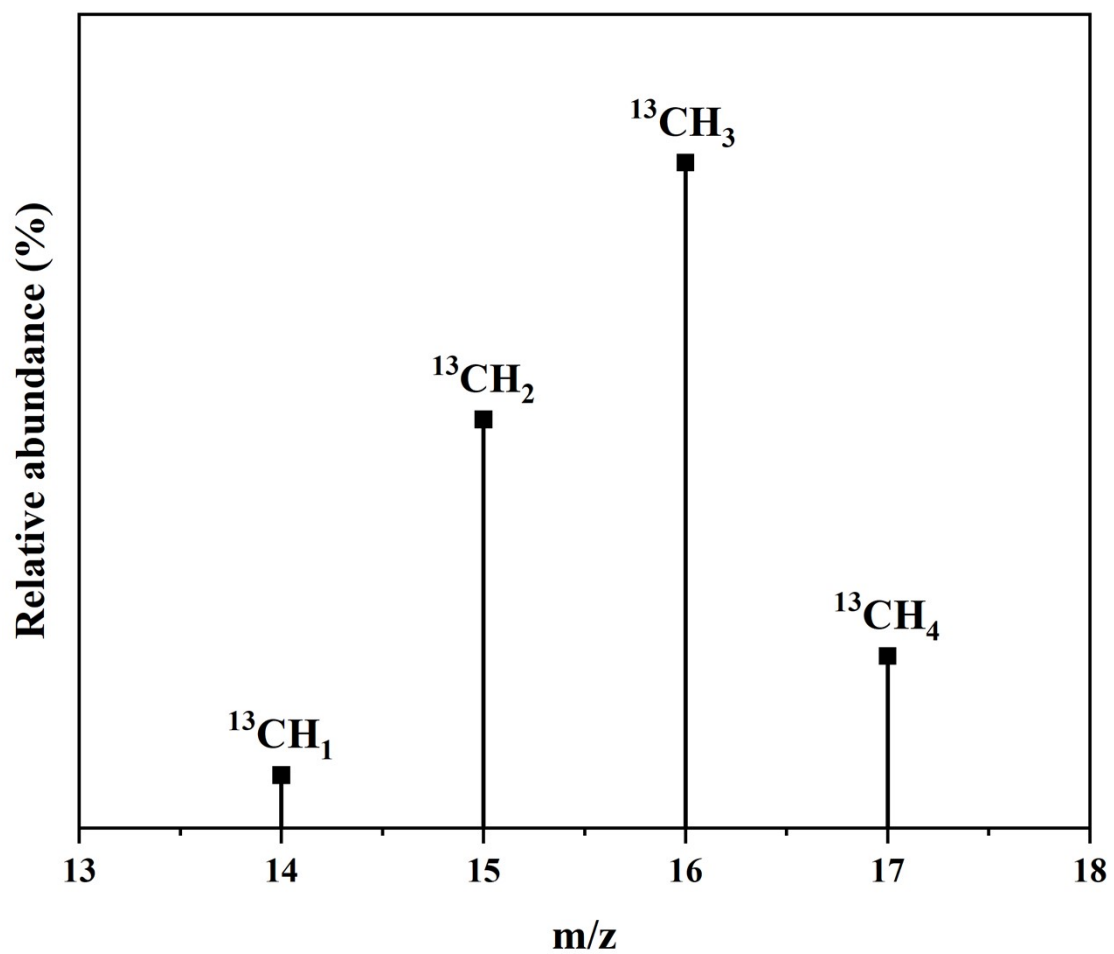

**Figure S11.** Mass spectra of  $^{13}\text{CO}$  (inset) produced over NiCo/C.

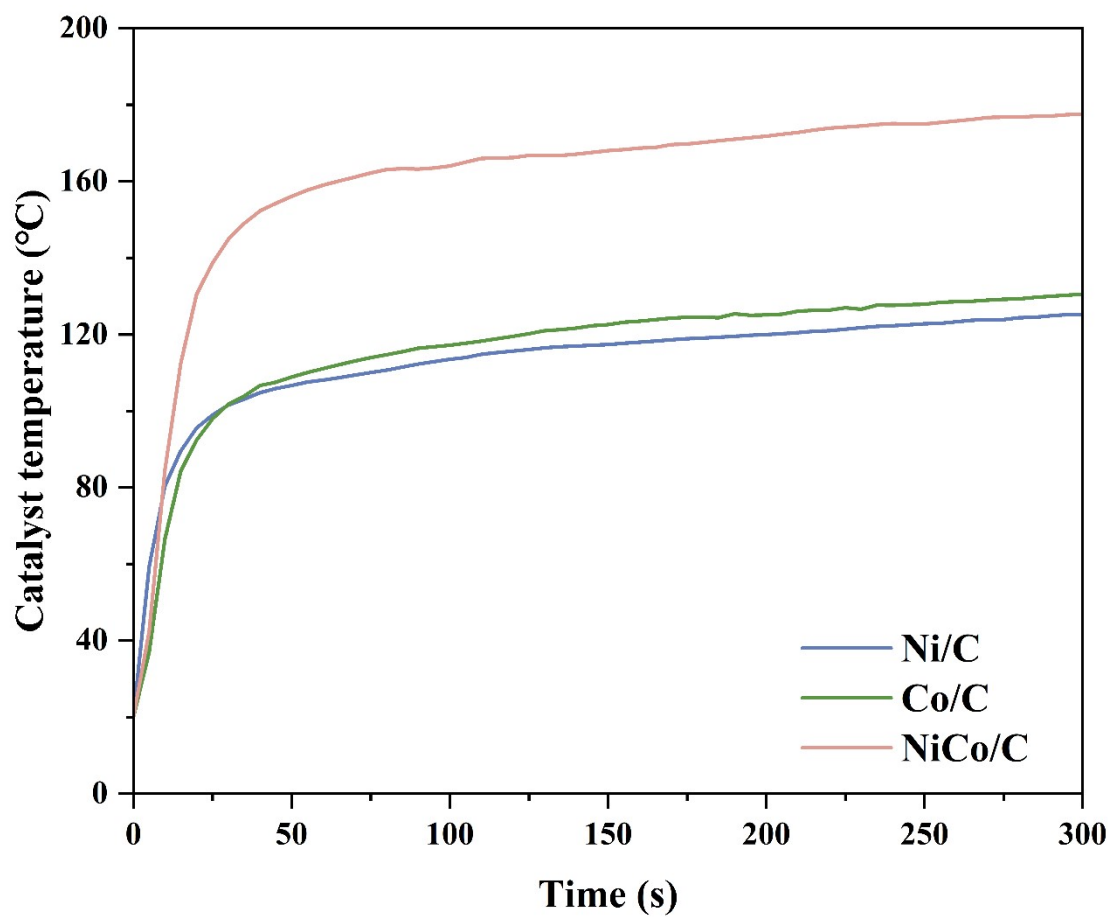

**Figure S12.** Temperature changes over Ni/C, Co/C and NiCo/C under light irradiation.

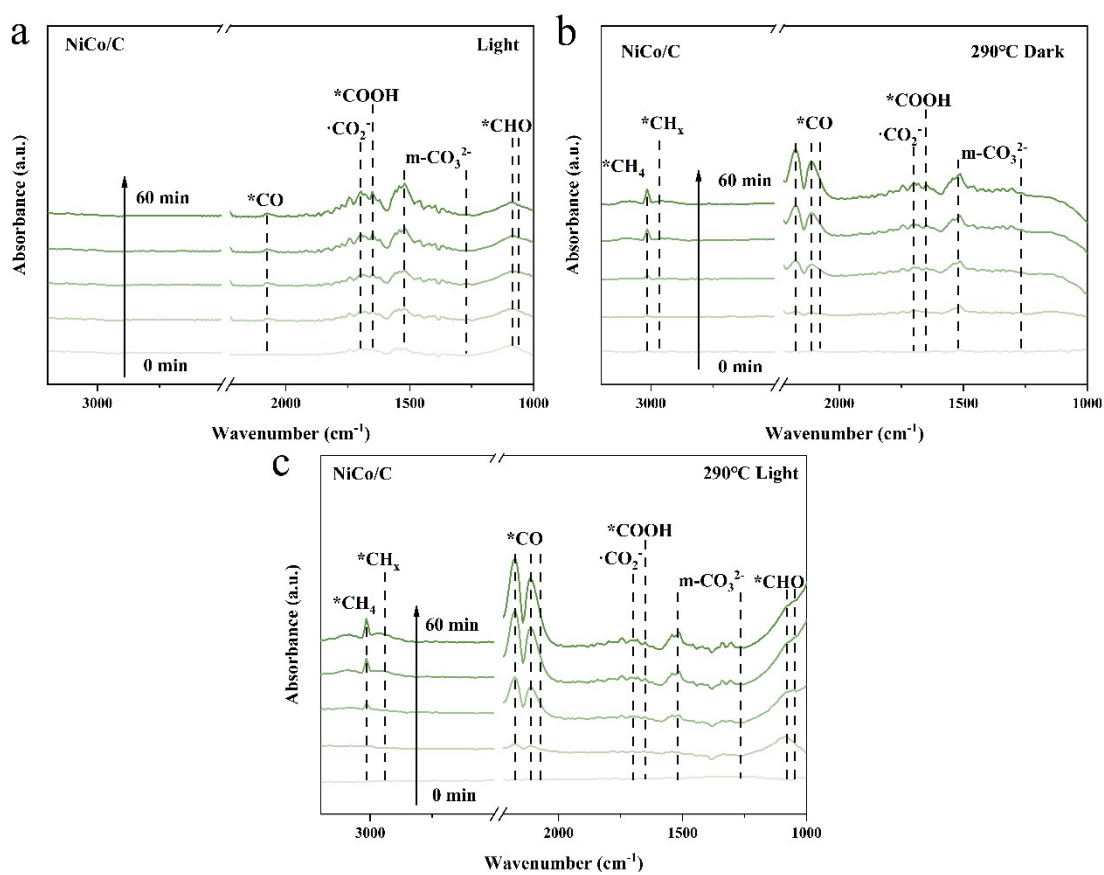

**Figure S13.** In situ DRIFTS spectra of NiCo/C catalyst a) under light irradiation, b) at 290 °C in dark, c) at 290 °C under light irradiation.

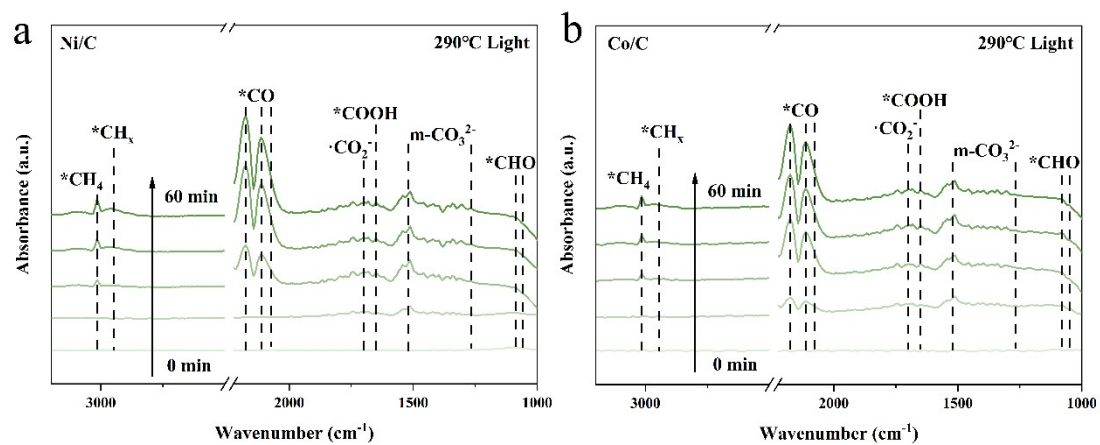

**Figure S14.** In situ DRIFTS spectra of a) Ni@C, b) Co@C catalysts at 290 °C under light irradiation.

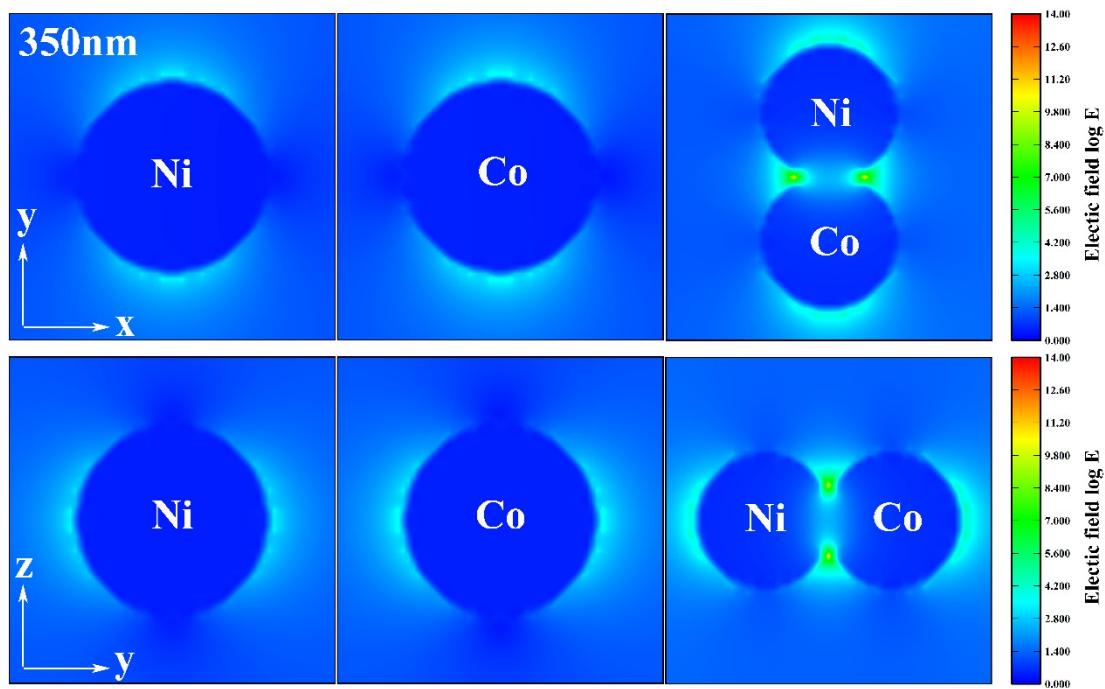

**Figure S15.** Induced electric field distributions of monometallic and bimetallic catalysts (Wave vector direction: x; Direction of polarization: y).

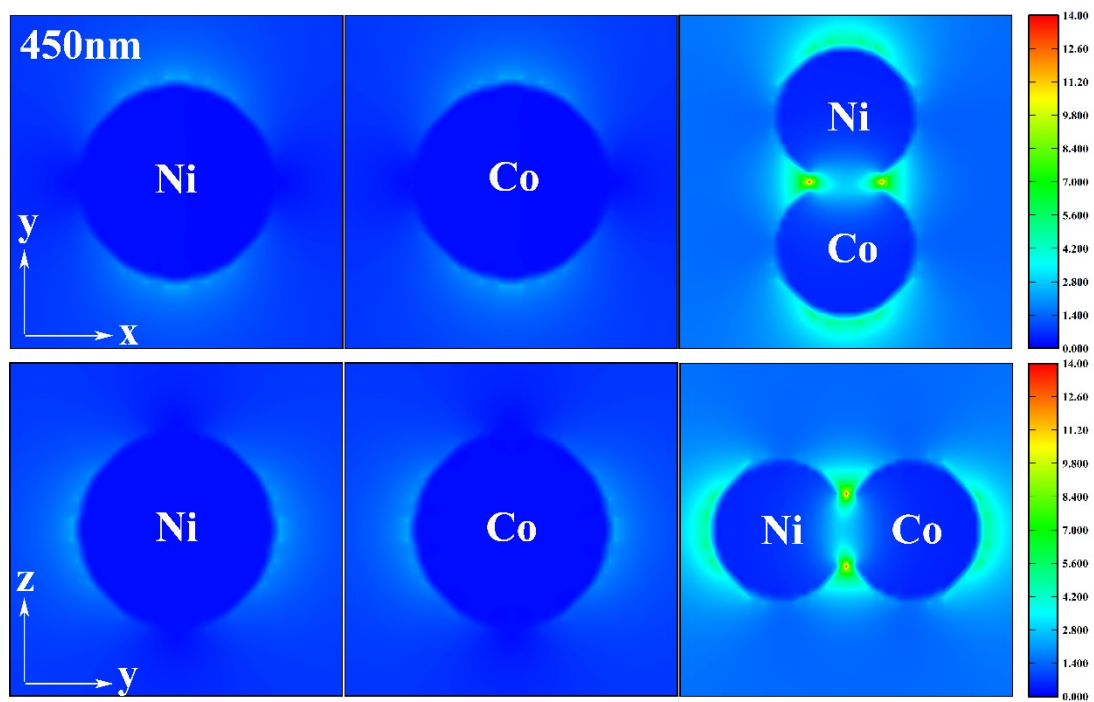

**Figure S16.** Induced electric field distributions of monometallic and bimetallic catalysts (Wave vector direction: x; Direction of polarization: y).



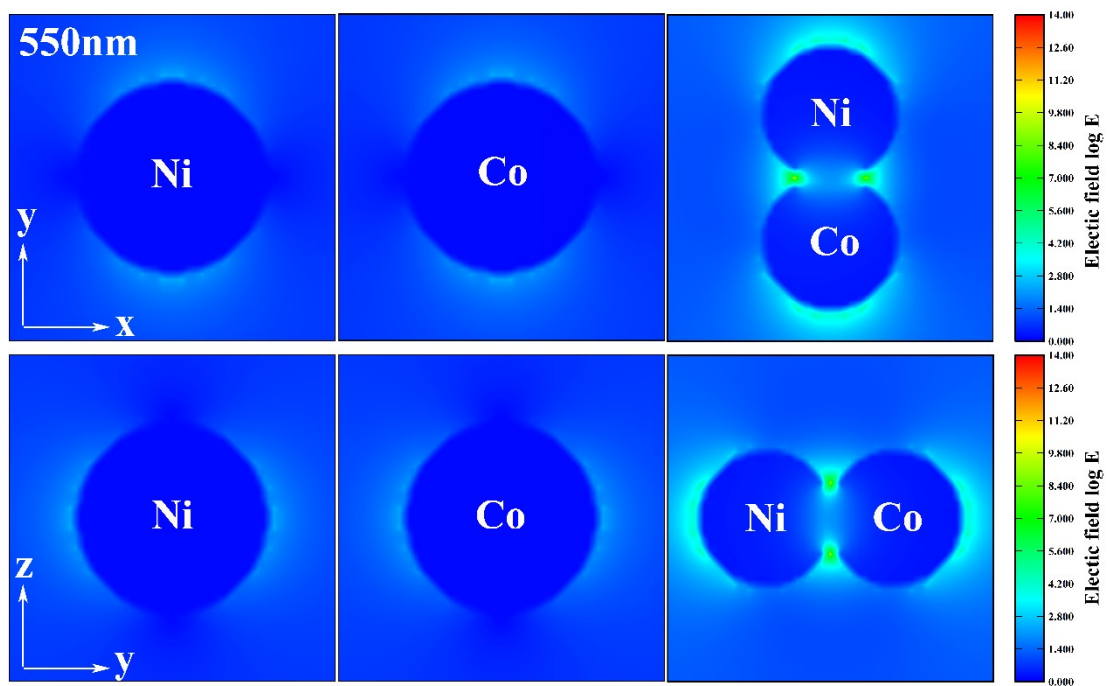

**Figure S17.** Induced electric field distributions of monometallic and bimetallic catalysts (Wave vector direction: x; Direction of polarization: y).

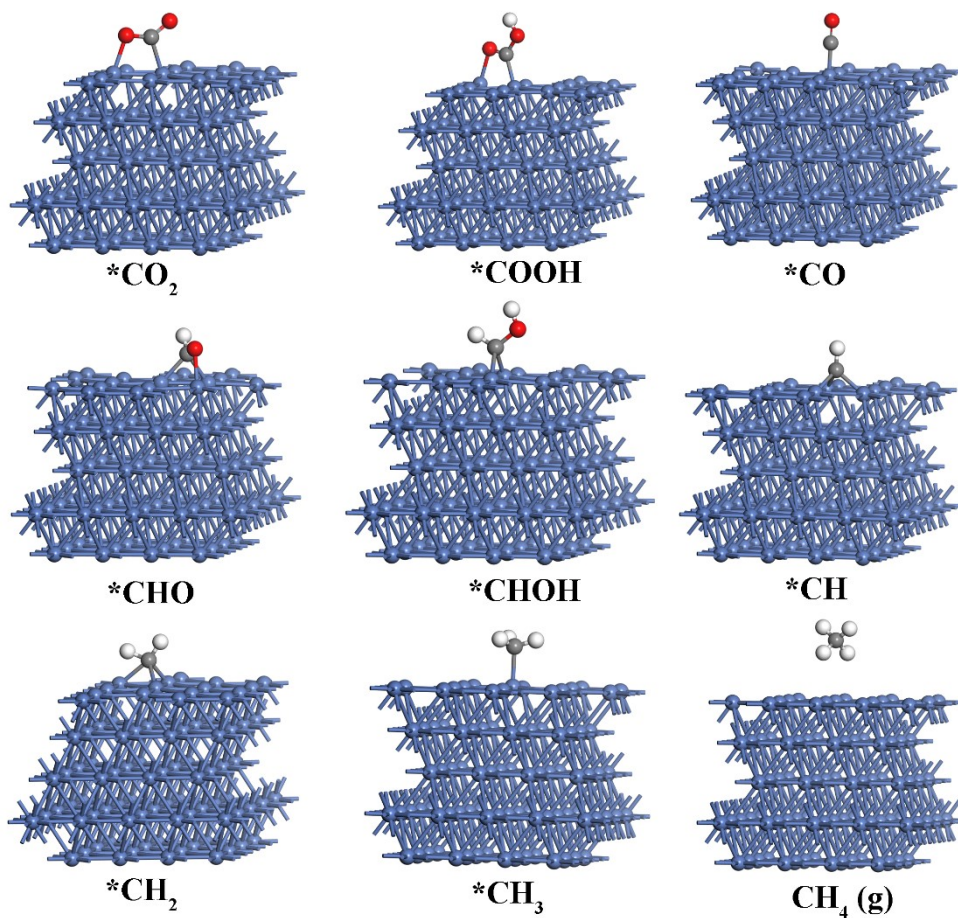

**Figure S18.** The optimized geometry of participating intermediates on Ni (111). The blue, grey, red and white spheres represent Ni, C, O and H atoms, respectively.

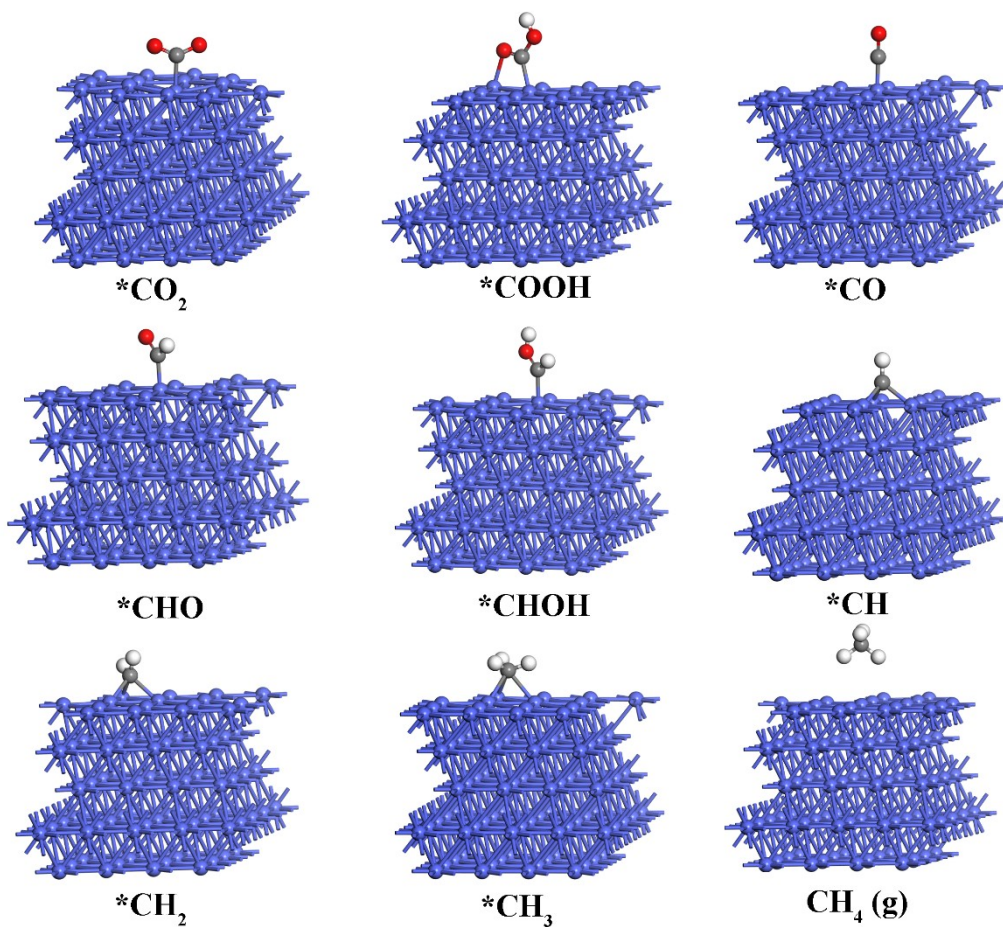

**Figure S19.** The optimized geometry of participating intermediates on Co (111). The purple, grey, red and white spheres represent Co, C, O and H atoms, respectively.

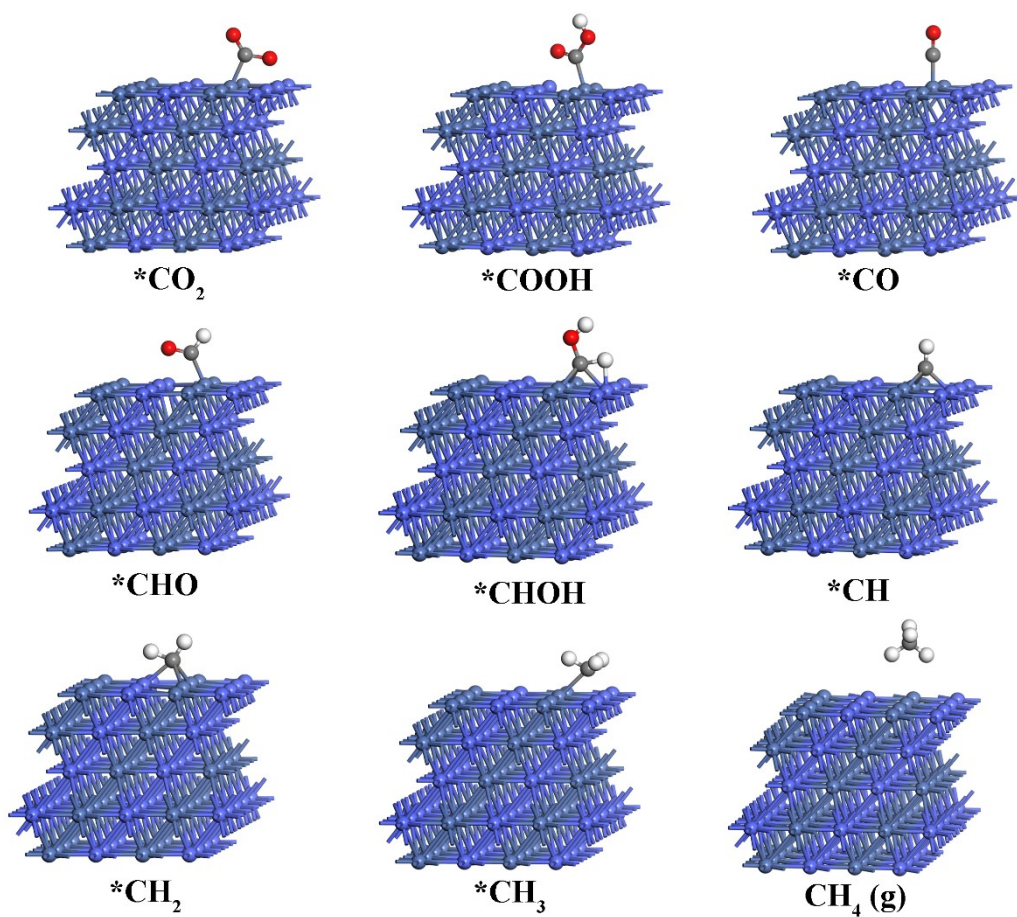

**Figure S20.** The optimized geometry of participating intermediates on Ni-Co (111). The blue, purple, grey, red and white spheres represent Ni, Co, C, O and H atoms, respectively.

**Table S1.** The comparison of catalytic activities with other reported catalysts for photo-thermal catalytic CO<sub>2</sub> hydro-methanation

| Catalysis                            | Light source                                      | External heating sources | Reactor type | Pressure (MPa) | Temperature (°C) | CO <sub>2</sub> :H <sub>2</sub> rate | CH <sub>4</sub> rate (mmol g <sup>-1</sup> h <sup>-1</sup> ) | Selectivity (%) | Ref.      |
|--------------------------------------|---------------------------------------------------|--------------------------|--------------|----------------|------------------|--------------------------------------|--------------------------------------------------------------|-----------------|-----------|
| Ru/SiO <sub>2</sub>                  | 300W Xe lamp                                      | Yes                      | Flow         | 0.1            | 300              | 1:6                                  | 35.1 <sup>a</sup>                                            | 99.9            | 2         |
| 8Ni/TiO <sub>2</sub>                 | 375W IR Light                                     | No                       | Flow         | 0.1            | 330              | 1:4                                  | 21.8 <sup>b</sup>                                            | 99.5            | 3         |
| 8Ni/TiO <sub>2</sub>                 | 300W Xe lamp                                      | No                       | Flow         | 0.1            | 198              | 1:4                                  | 6.3 <sup>a</sup>                                             | 72.3            | 3         |
| Ir/Uio-66                            | 200-1000nm 300W Xe lamp                           | Yes                      | Flow         | 0.1            | 250              | 1:4                                  | 19.9 <sup>b</sup>                                            | 95.0            | 4         |
| Ni@SiXNS-EtOH                        | -                                                 | Yes                      | Flow         | 0.1            | 300              | 1:4                                  | 100.0 <sup>a</sup>                                           | 90.0            | 5         |
| Ru/TiO <sub>2</sub>                  | 500 W solar simulator                             | Yes                      | Flow         | 0.1            | 300              | 1:3                                  | 69.5 <sup>b</sup>                                            | -               | 6         |
| Ni/Nb <sub>2</sub> C                 | 300W Xe lamp                                      | No                       | Batch/Flow   | 0.1            | 321              | 1:1                                  | 72.5 <sup>b</sup>                                            | 83%             | 7         |
| Ru/H <sub>x</sub> MoO <sub>3-y</sub> | 300W Xe lamp                                      | No                       | Flow         | 0.1            | 140              | 1:1                                  | 20.8 <sup>b</sup>                                            | 100             | 8         |
| NiCo/C                               | 300-2500nm 300 W Xe lamp<br>0.1 W/cm <sup>2</sup> | Yes                      | Flow         | 0.1            | 290              | 1:3                                  | 67.8 <sup>a</sup><br>55.6 <sup>b</sup>                       | 98.0            | This work |

<sup>a</sup>(mmol g<sub>metal</sub><sup>-1</sup> h<sup>-1</sup>)

<sup>b</sup>(mmol g<sub>catalyst</sub><sup>-1</sup> h<sup>-1</sup>)

**Table S2.** Energy barriers of elementary steps in CO<sub>2</sub> hydro-methanation reactions on Ni, Co and NiCo(111).

| Entry | Species                                    | Ni Eabs/eV | Co Eabs/eV | NiCo Eabs/eV |
|-------|--------------------------------------------|------------|------------|--------------|
| 1     | CO <sub>2</sub> (g) + * → *CO <sub>2</sub> | 0.60       | 0.56       | 0.45         |
| 2     | *CO <sub>2</sub> + *H → *COOH              | -0.23      | 0.10       | 0.01         |
| 3     | *COOH + *H → *CO + H <sub>2</sub> O        | -0.81      | -0.98      | -0.82        |
| 4     | *CO + *H → *CHO                            | 1.06       | 0.98       | 0.82         |
| 5     | *CHO + *H → *CHOH                          | 0.03       | 0.54       | 0.11         |
| 6     | *CHOH + *H → *CH + H <sub>2</sub> O        | -1.18      | -1.53      | -0.9         |
| 7     | *CH + *H → *CH <sub>2</sub>                | 0.14       | 0.11       | 0.04         |
| 8     | *CH <sub>2</sub> + *H → *CH <sub>3</sub>   | 0.04       | -0.36      | -0.52        |
| 9     | *CH <sub>3</sub> + *H → *CH <sub>4</sub>   | -0.49      | -0.28      | -0.24        |
| 10    | *CH <sub>4</sub> → CH <sub>4</sub> (g) + * | -0.33      | 0.06       | 0.06         |

1. S. Zhao, Y. Wang, J. Dong, C.-T. He, H. Yin, P. An, K. Zhao, X. Zhang, C. Gao, L. Zhang, J. Lv, J. Wang, J. Zhang, A. M. Khattak, N. A. Khan, Z. Wei, J. Zhang, S. Liu, H. Zhao and Z. Tang, *Nature Energy*, 2016, **1**, 16184.
2. C. Kim, S. Hyeon, J. Lee, W. D. Kim, D. C. Lee, J. Kim and H. Lee, *Nature Communications*, 2018, **9**, 3027.
3. Q. Li, Y. Gao, M. Zhang, H. Gao, J. Chen and H. Jia, *Applied Catalysis B: Environmental*, 2022, **303**, 120905.
4. Y. Tang, Z. Yang, C. Guo, H. Han, Y. Jiang, Z. Wang, J. Liu, L. Wu and F. Wang, *Journal of Materials Chemistry A*, 2022, **10**, 12157-12167.
5. X. Yan, W. Sun, L. Fan, P. N. Duchesne, W. Wang, C. Kübel, D. Wang, S. G. H. Kumar, Y. F. Li, A. Tavasoli, T. E. Wood, D. L. H. Hung, L. Wan, L. Wang, R. Song, J. Guo, I. Gourevich, F. M. Ali, J. Lu, R. Li, B. D. Hatton and G. A. Ozin, *Nature Communications*, 2019, **10**, 2608.
6. C. Wang, S. Fang, S. Xie, Y. Zheng and Y. H. Hu, *Journal of Materials Chemistry A*, 2020, **8**, 7390-7394.
7. Z. Wu, C. Li, Z. Li, K. Feng, M. Cai, D. Zhang, S. Wang, M. Chu, C. Zhang, J. Shen, Z. Huang, Y. Xiao, G. A. Ozin, X. Zhang and L. He, *ACS Nano*, 2021, **15**, 5696-5705.
8. H. Ge, Y. Kuwahara, K. Kusu, Z. Bian and H. Yamashita, *Applied Catalysis B: Environmental*, 2022, **317**, 121734.
